# Supplementary material for: Reduction of Ammonia Emissions from Laying Hen Manure in a Closed Composting Process Using Gas-Permeable Membrane Technology
Source: MDPI journal article supplement (doi:10.3390/agronomy11122384), 2021-11-24
Supplement: s1 [file s1]

# Reduction of ammonia emissions from laying hen manure in a closed composting process using gas-permeable membrane technology

M. Soto-Herranz, M. Sánchez-Báscones, J.M. Antolín-Rodríguez and P. Martín-Ramos

## SUPPLEMENTARY MATERIAL

**Table S1.** Physicochemical parameters of the initial product mixture samples in each treatment.

| Parameters*                                    | Control      | System 1 (S1) | System 2 (S2) |
|------------------------------------------------|--------------|---------------|---------------|
| MC (%) <sup>a</sup>                            | 51,9 ± 0,9   | 58,9 ± 7,4    | 60,0 ± 0,4    |
| VS (%) <sup>b</sup>                            | 72,6 ± 3,1   | 82,2 ± 0,4    | 73,9 ± 0,9    |
| pH <sup>a</sup>                                | 6,2 ± 0,1    | 6,8 ± 0,0     | 6,6 ± 0,0     |
| EC (mS·cm <sup>-1</sup> ) <sup>a</sup>         | 4,47 ± 0,40  | 2,86 ± 0,03   | 3,08 ± 0,02   |
| TN (%) <sup>b</sup>                            | 2,78 ± 0,02  | 2,93 ± 0,01   | 3,15 ± 0,02   |
| NH <sub>4</sub> -N (%) <sup>a</sup>            | 0,19 ± 0,00  | 0,14 ± 0,01   | 0,16 ± 0,00   |
| P <sub>2</sub> O <sub>5</sub> (%) <sup>b</sup> | 0,80 ± 0,02  | 0,60 ± 0,04   | 0,73 ± 0,02   |
| P assim (%) <sup>b</sup>                       | 0,08 ± 0,01  | 0,06 ± 0,00   | 0,08 ± 0,00   |
| K (mg·kg <sup>-1</sup> ) <sup>b</sup>          | 11515 ± 422  | 9053 ± 494    | 9624 ± 155    |
| Na (mg·kg <sup>-1</sup> ) <sup>b</sup>         | 1461 ± 68    | 1286 ± 74     | 1214 ± 34     |
| Ca (mg·kg <sup>-1</sup> ) <sup>b</sup>         | 48389 ± 2890 | 38673 ± 2744  | 40644 ± 701   |
| Mg (mg·kg <sup>-1</sup> ) <sup>b</sup>         | 4142 ± 179   | 3066 ± 159    | 3317 ± 70     |
| K asim (mg·kg <sup>-1</sup> ) <sup>b</sup>     | 16899 ± 2093 | 14856 ± 75    | 16336 ± 1707  |
| Na asim (mg·kg <sup>-1</sup> ) <sup>b</sup>    | 2148 ± 276   | 2281 ± 6      | 2413 ± 103    |
| Ca asim (mg·kg <sup>-1</sup> ) <sup>b</sup>    | 7152 ± 732   | 5211 ± 89     | 4398 ± 98     |
| Mg asim (mg·kg <sup>-1</sup> ) <sup>b</sup>    | 3998 ± 514   | 3275 ± 5      | 1915 ± 28     |
| Cu (mg·kg <sup>-1</sup> ) <sup>b</sup>         | 30 ± 1,2     | 19,8 ± 0,8    | 22 ± 0,4      |
| Fe (mg·kg <sup>-1</sup> ) <sup>b</sup>         | 434 ± 31     | 1048 ± 70     | 842 ± 30      |
| Mn (mg·kg <sup>-1</sup> ) <sup>b</sup>         | 182 ± 4      | 135 ± 4       | 144 ± 4       |
| Zn (mg·kg <sup>-1</sup> ) <sup>b</sup>         | 199 ± 17     | 150 ± 13      | 158 ± 7       |
| Hg (µg·kg <sup>-1</sup> ) <sup>b</sup>         | 5,3 ± 0,1    | 4,7 ± 0,1     | 5,8 ± 0,1     |

\* Moisture content (MC), volatile solids (VS), electrical conductivity (EC), total nitrogen (NT), ammoniacal nitrogen (NH<sub>4</sub>-N), total phosphorus (P<sub>2</sub>O<sub>5</sub>), assimilable phosphorus (P assim). Values are expressed as mean ± standard deviation (*n* = 3).

<sup>a</sup> Measurement based on wet weight; <sup>b</sup> Measurement based on dry weight.

**Table S2.** Physicochemical parameters of the product mixture samples at the end of the experiment (after 44 days) in each treatment.

| Parameters*                                    | Control       | System 1 (S1) | System 2 (S2) |
|------------------------------------------------|---------------|---------------|---------------|
| MC (%) <sup>a</sup>                            | 55,0 ± 1,4    | 60,4 ± 0,3    | 56,3 ± 1,3    |
| VS (%) <sup>b</sup>                            | 53,9 ± 1,9    | 63,2 ± 1,5    | 67,0 ± 4,6    |
| pH <sup>a</sup>                                | 8,5 ± 0,1     | 8,6 ± 0,3     | 8,6 ± 0,0     |
| EC (mS·cm <sup>-1</sup> ) <sup>a</sup>         | 2,53 ± 0,08   | 2,65 ± 0,18   | 4,26 ± 0,31   |
| TN (%) <sup>b</sup>                            | 2,39 ± 0,02   | 2,72 ± 0,02   | 2,99 ± 0,05   |
| NH <sub>4</sub> -N (%) <sup>a</sup>            | 0,05 ± 0,00   | 0,16 ± 0,02   | 0,19 ± 0,03   |
| P <sub>2</sub> O <sub>5</sub> (%) <sup>b</sup> | 1,22 ± 0,06   | 0,99 ± 0,05   | 1,08 ± 0,04   |
| P assim (%) <sup>b</sup>                       | 0,13 ± 0,01   | 0,14 ± 0,01   | 0,12 ± 0,00   |
| K (mg·kg <sup>-1</sup> ) <sup>b</sup>          | 12085 ± 945   | 19045 ± 688   | 13410 ± 507   |
| Na (mg·kg <sup>-1</sup> ) <sup>b</sup>         | 1622 ± 275    | 2983 ± 107    | 2200 ± 85     |
| Ca (mg·kg <sup>-1</sup> ) <sup>b</sup>         | 81379 ± 19310 | 57930 ± 3247  | 70978 ± 2924  |
| Mg (mg·kg <sup>-1</sup> ) <sup>b</sup>         | 6075 ± 976    | 4735 ± 229    | 5283 ± 194    |
| K asim (mg·kg <sup>-1</sup> ) <sup>b</sup>     | 21320 ± 212   | 25592 ± 666   | 18302 ± 922   |
| Na asim (mg·kg <sup>-1</sup> ) <sup>b</sup>    | 2461 ± 37     | 3871 ± 116    | 2879 ± 94     |
| Ca asim (mg·kg <sup>-1</sup> ) <sup>b</sup>    | 6972 ± 32     | 4142 ± 149    | 4539 ± 116    |
| Mg asim (mg·kg <sup>-1</sup> ) <sup>b</sup>    | 3250 ± 168    | 1858 ± 69     | 3642 ± 103    |
| Cu (mg·kg <sup>-1</sup> ) <sup>b</sup>         | 40 ± 4,1      | 35 ± 1,0      | 34 ± 1,0      |
| Fe (mg·kg <sup>-1</sup> ) <sup>b</sup>         | 632 ± 74      | 1084 ± 7      | 918 ± 48      |
| Mn (mg·kg <sup>-1</sup> ) <sup>b</sup>         | 265 ± 42      | 214 ± 13      | 234 ± 12      |
| Zn (mg·kg <sup>-1</sup> ) <sup>b</sup>         | 278 ± 31      | 244 ± 15      | 242 ± 6       |
| Hg (µg·kg <sup>-1</sup> ) <sup>b</sup>         | 6,3 ± 0,1     | 8,4 ± 0,3     | 5,4 ± 0,0     |

\* Moisture content (MC), volatile solids (VS), electrical conductivity (EC), total nitrogen (TN), ammoniacal nitrogen (NH<sub>4</sub>-N), total phosphorus (P<sub>2</sub>O<sub>5</sub>), assimilable phosphorus (P assim). Values are expressed as mean ± standard deviation (*n* = 3).

<sup>a</sup> Measurement based on wet weight; <sup>b</sup> Measurement based on dry weight.

### *Economic assessment of system 1*

Assumptions:

- The composting unit had a volume of 3.7 m<sup>3</sup> and treated 5.65 kg N from a mixture of manure and straw (470 kg chicken manure + wheat straw). The average N-NH<sub>3</sub> production was 0.29 kg N·m<sup>-3</sup>.
- Each batch of the composting process has a duration of 44 days.
- 76% of the TAN emissions in the composting unit are recovered in the form of (NH<sub>4</sub>)<sub>2</sub>SO<sub>4</sub>.
- The maximum recovery rate is 6.9 g TAN m<sup>-2</sup> day<sup>-1</sup>.
- The cost of the closed aerobic composter (7,767 €) was excluded from the analysis.
- The costs of the modifications made to the standard closed aerobic composter are itemized in Table S3, and account for 6084.5 €.
- 1.96 m<sup>2</sup> of membrane were used at a cost of 156.25 €·m<sup>-2</sup> (market price in 2020). A 20% replacement per year has been considered.
- The annualised costs of the equipment are calculated assuming a lifespan of 10 years and an interest rate of 8% [97].
- The energy consumption was estimated at 15.7 kWh day<sup>-1</sup>.
- It is estimated that the compost produced is sold at 20 €·tonne<sup>-1</sup> (average market price [1]).

**Table S3.** Estimated costs for the modifications made to the standard closed aerobic composter in system S1.

| Equipment                                    | Cost (€)  |
|----------------------------------------------|-----------|
| PLC control                                  | 700       |
| HMI screen                                   | 345       |
| Acid pump                                    | 610       |
| Gas detectors                                | 1,950     |
| Temperature and pH probes                    | 1,250     |
| Flow probe                                   | 350       |
| Potentiometer for controlling flowrate       | 350       |
| Acid tank (60 L)                             | 28.5      |
| Piping                                       | 164       |
| Steel rods and clamps for membranes mounting | 31        |
| Membranes                                    | 306       |
| Total                                        | 6,084.5 € |

**Table S4.** Summary of capital expenses, operating expenses and operating revenues for a closed aerobic composting system with an NH<sub>3</sub> capture system based on GPM technology directly installed in the aerobic composter.

| Capital Expenses                                    |                           |                                                         |
|-----------------------------------------------------|---------------------------|---------------------------------------------------------|
|                                                     | Initial Investment<br>(€) | Annualized Costs:<br>8% interest, 10-year life (€/year) |
| Nitrogen recovery prototype                         | 6,084.5                   | 907                                                     |
| Operational Expenses                                |                           |                                                         |
|                                                     | Annual expenses (€/year)  |                                                         |
| Membranes replacement (20%)                         | -                         | 61                                                      |
| Chemicals (H <sub>2</sub> SO <sub>4</sub> )         | -                         | 4                                                       |
| Power (ΣkWh)                                        | -                         | 626                                                     |
| Total operational annual costs                      | -                         | 691                                                     |
| Total annualized cost                               |                           | 1598                                                    |
| Revenue (€/year)                                    |                           |                                                         |
| Sale of compost                                     |                           | 38                                                      |
| Recovered nitrogen:<br>6.74 kg N/year (€ 2.36/kg N) |                           | 16                                                      |
| <b>Net annual cost</b>                              |                           | <b>1,544</b>                                            |

### *Economic assessment of system 2*

#### Assumptions:

- The composting unit had a volume of 3.7 m<sup>3</sup> and treated 6.35 kg N from a mixture of manure and straw (470 kg chicken manure + wheat straw). The average N-NH<sub>3</sub> production was 0.32 kg N·m<sup>-3</sup>.
- Each batch of the composting process lasts 44 days.
- 80% of the TAN emissions in the composting unit are recovered in the form of (NH<sub>4</sub>)<sub>2</sub>SO<sub>4</sub>.
- The maximum recovery rate is 1.9 g TAN m<sup>-2</sup>·day<sup>-1</sup>.
- The cost of the closed aerobic composter (7,767 €) was excluded from the analysis.
- The costs of the modifications made to the standard closed aerobic composter are itemized in Table S5, and account for 13,595 €.
- 7.7 m<sup>2</sup> of membrane has been used at a cost of 156.25 €·m<sup>-2</sup> (market price in 2020). A replacement of 20% per year is considered.
- The annualised costs of the equipment are calculated using a lifespan of 10 years and an interest rate of 8% [97].

- The energy consumption is estimated at 15.7 kWh day<sup>-1</sup>.
- It is estimated that the compost produced is sold at 20 € tonne<sup>-1</sup> (average market price [1]).

**Table S5.** Estimated costs for the external compartment and modifications made to the standard closed aerobic composter in system S2.

| Equipment                              | Cost (€)        |
|----------------------------------------|-----------------|
| PLC control                            | 700             |
| HMI screen                             | 345             |
| Acid pump                              | 610             |
| Prototype fan                          | 450             |
| Gas detectors                          | 1,950           |
| Temperature and pH probes              | 1,250           |
| Flow probe                             | 350             |
| Potentiometer for controlling flowrate | 350             |
| Acid tank (150 L)                      | 200             |
| Structure                              | 1,350           |
| Piping                                 | 1,222           |
| Electric board                         | 2,135           |
| Membranes mounting steel mounting      | 450             |
| Composter fan                          | 1,000           |
| Temperature probe                      | 30              |
| Membranes                              | 1,203           |
| <b>Total</b>                           | <b>13,595 €</b> |

**Table S6.** Summary of capital expenses, operating expenses and operating revenues for a closed aerobic composting system connected to an external compartment with the NH<sub>3</sub> capture system based on GPM technology.

| Capital Expenses                                    |                           |                                                         |
|-----------------------------------------------------|---------------------------|---------------------------------------------------------|
|                                                     | Initial Investment<br>(€) | Annualized Costs:<br>8% interest, 10-year life (€/year) |
| Nitrogen recovery prototype                         | 13,595                    | 2,026                                                   |
| Operational Expenses                                |                           |                                                         |
|                                                     | Annual costs (€/year)     |                                                         |
| Membranes replacement (20%)                         | -                         | 241                                                     |
| Chemicals (H <sub>2</sub> SO <sub>4</sub> )         | -                         | 10                                                      |
| Power (ΣkWh)                                        | -                         | 626                                                     |
| Total operational annual costs                      | -                         | 877                                                     |
| Total annualized cost                               |                           | 2,903                                                   |
| Revenue (€/year)                                    |                           |                                                         |
| Sale of compost                                     |                           | 38                                                      |
| Recovered nitrogen:<br>7.83 kg N/year (€ 2.36/kg N) |                           | 19                                                      |
| Net annual cost                                     |                           | 2,846                                                   |
